# Supplementary material for: Cimicifugae Rhizoma Extract Attenuates Oxidative Stress and Airway Inflammation via the Upregulation of Nrf2/HO-1/NQO1 and Downregulation of NF-κB Phosphorylation in Ovalbumin-Induced Asthma
Source: MDPI journal article supplement (doi:10.3390/antiox10101626), 2021-10-15
Supplement: s1 [file s1]

**Table S1.** Regression equation, linearity, LOD, and LOQ for five compounds ( $n = 3$ ).

| Compound           | Regression Equation <sup>a</sup> | Linear Range<br>( $\mu\text{g/mL}$ ) | Linearity<br>( $R^2$ ) | LOD <sup>b</sup><br>( $\mu\text{g/mL}$ ) | LOQ <sup>c</sup><br>( $\mu\text{g/mL}$ ) |
|--------------------|----------------------------------|--------------------------------------|------------------------|------------------------------------------|------------------------------------------|
| Caffeic acid       | $y = 24.632x + 2.4567$           | 2–10                                 | 0.9995                 | 0.02                                     | 0.05                                     |
| Ferulic acid       | $y = 27.354x + 11.697$           | 10–50                                | 0.9997                 | 0.10                                     | 0.31                                     |
| Isoferulic acid    | $y = 26.817x + 34.38$            | 40–200                               | 0.9997                 | 0.36                                     | 1.08                                     |
| Cimicifugic acid B | $y = 12.615x + 1.545$            | 10–50                                | 0.9998                 | 0.07                                     | 0.22                                     |
| Cimicifugic acid F | $y = 11.459x + 6.525$            | 40–200                               | 0.9997                 | 0.30                                     | 0.89                                     |

<sup>a</sup> y, peak area of compound; x, concentration ( $\mu\text{g/mL}$ ) of compound. <sup>b</sup>LOD, limit of detection, S/N = 3. <sup>c</sup>LOQ, limit of quantification, S/N = 10.
